# Supplementary material for: Genetic variation in clusterin and risk of dementia and ischemic vascular disease in the general population: cohort studies and meta-analyses of 362,338 individuals
Source: PubMed Central journal article supplement (PMC5851250; doi:10.1186/s12916-018-1029-3), 2018-03-14

### Vascular dementia

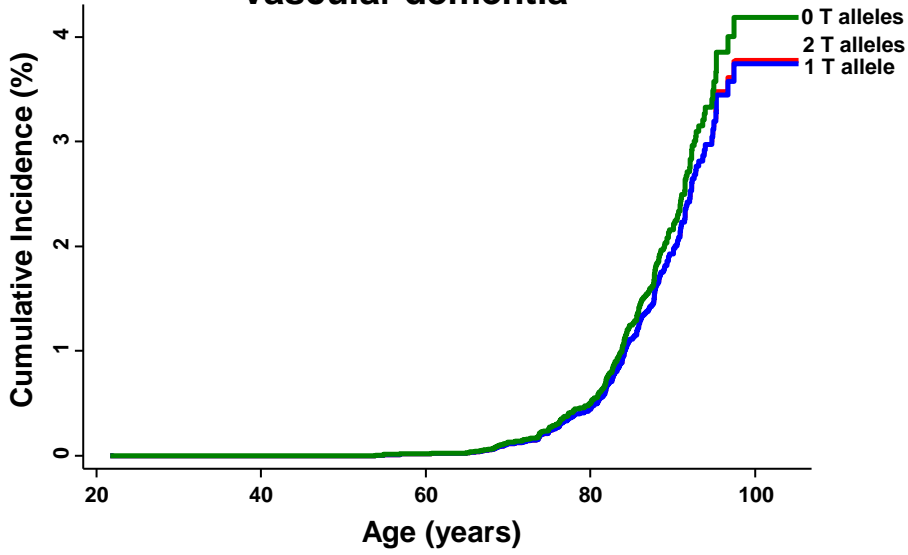

### Ischemic cerebrovascular disease

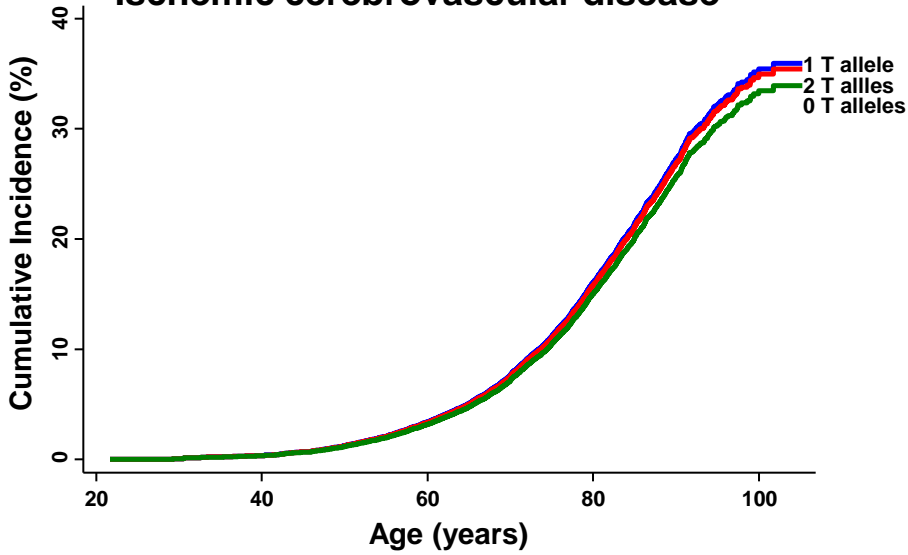

### Ischemic heart disease

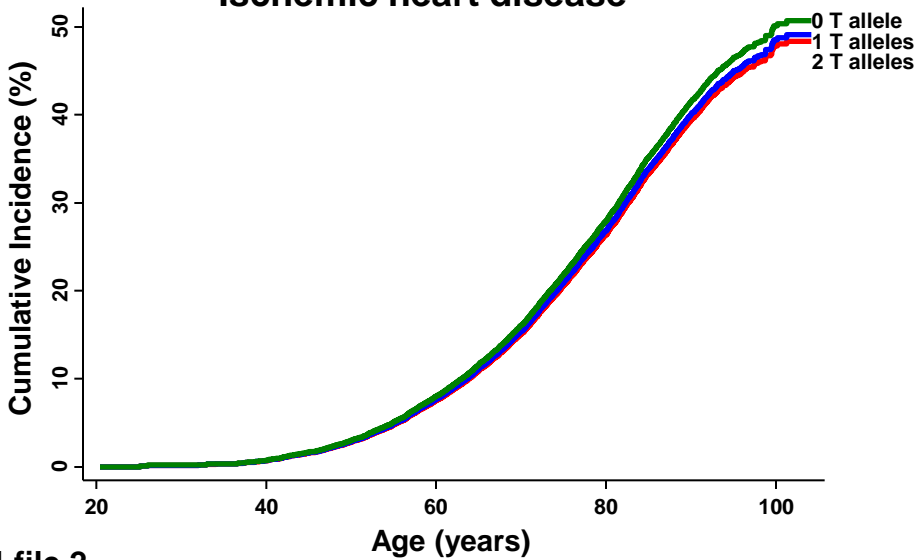

Supplement: 12916_2018_1029_MOESM2_ESM.pdf [file 12916_2018_1029_MOESM2_ESM.pdf]
