# Supplementary material for: Genetic variation in clusterin and risk of dementia and ischemic vascular disease in the general population: cohort studies and meta-analyses of 362,338 individuals
Source: Springer Nature journal article supplement (doi:10.1186/s12916-018-1029-3), 2018-03-09

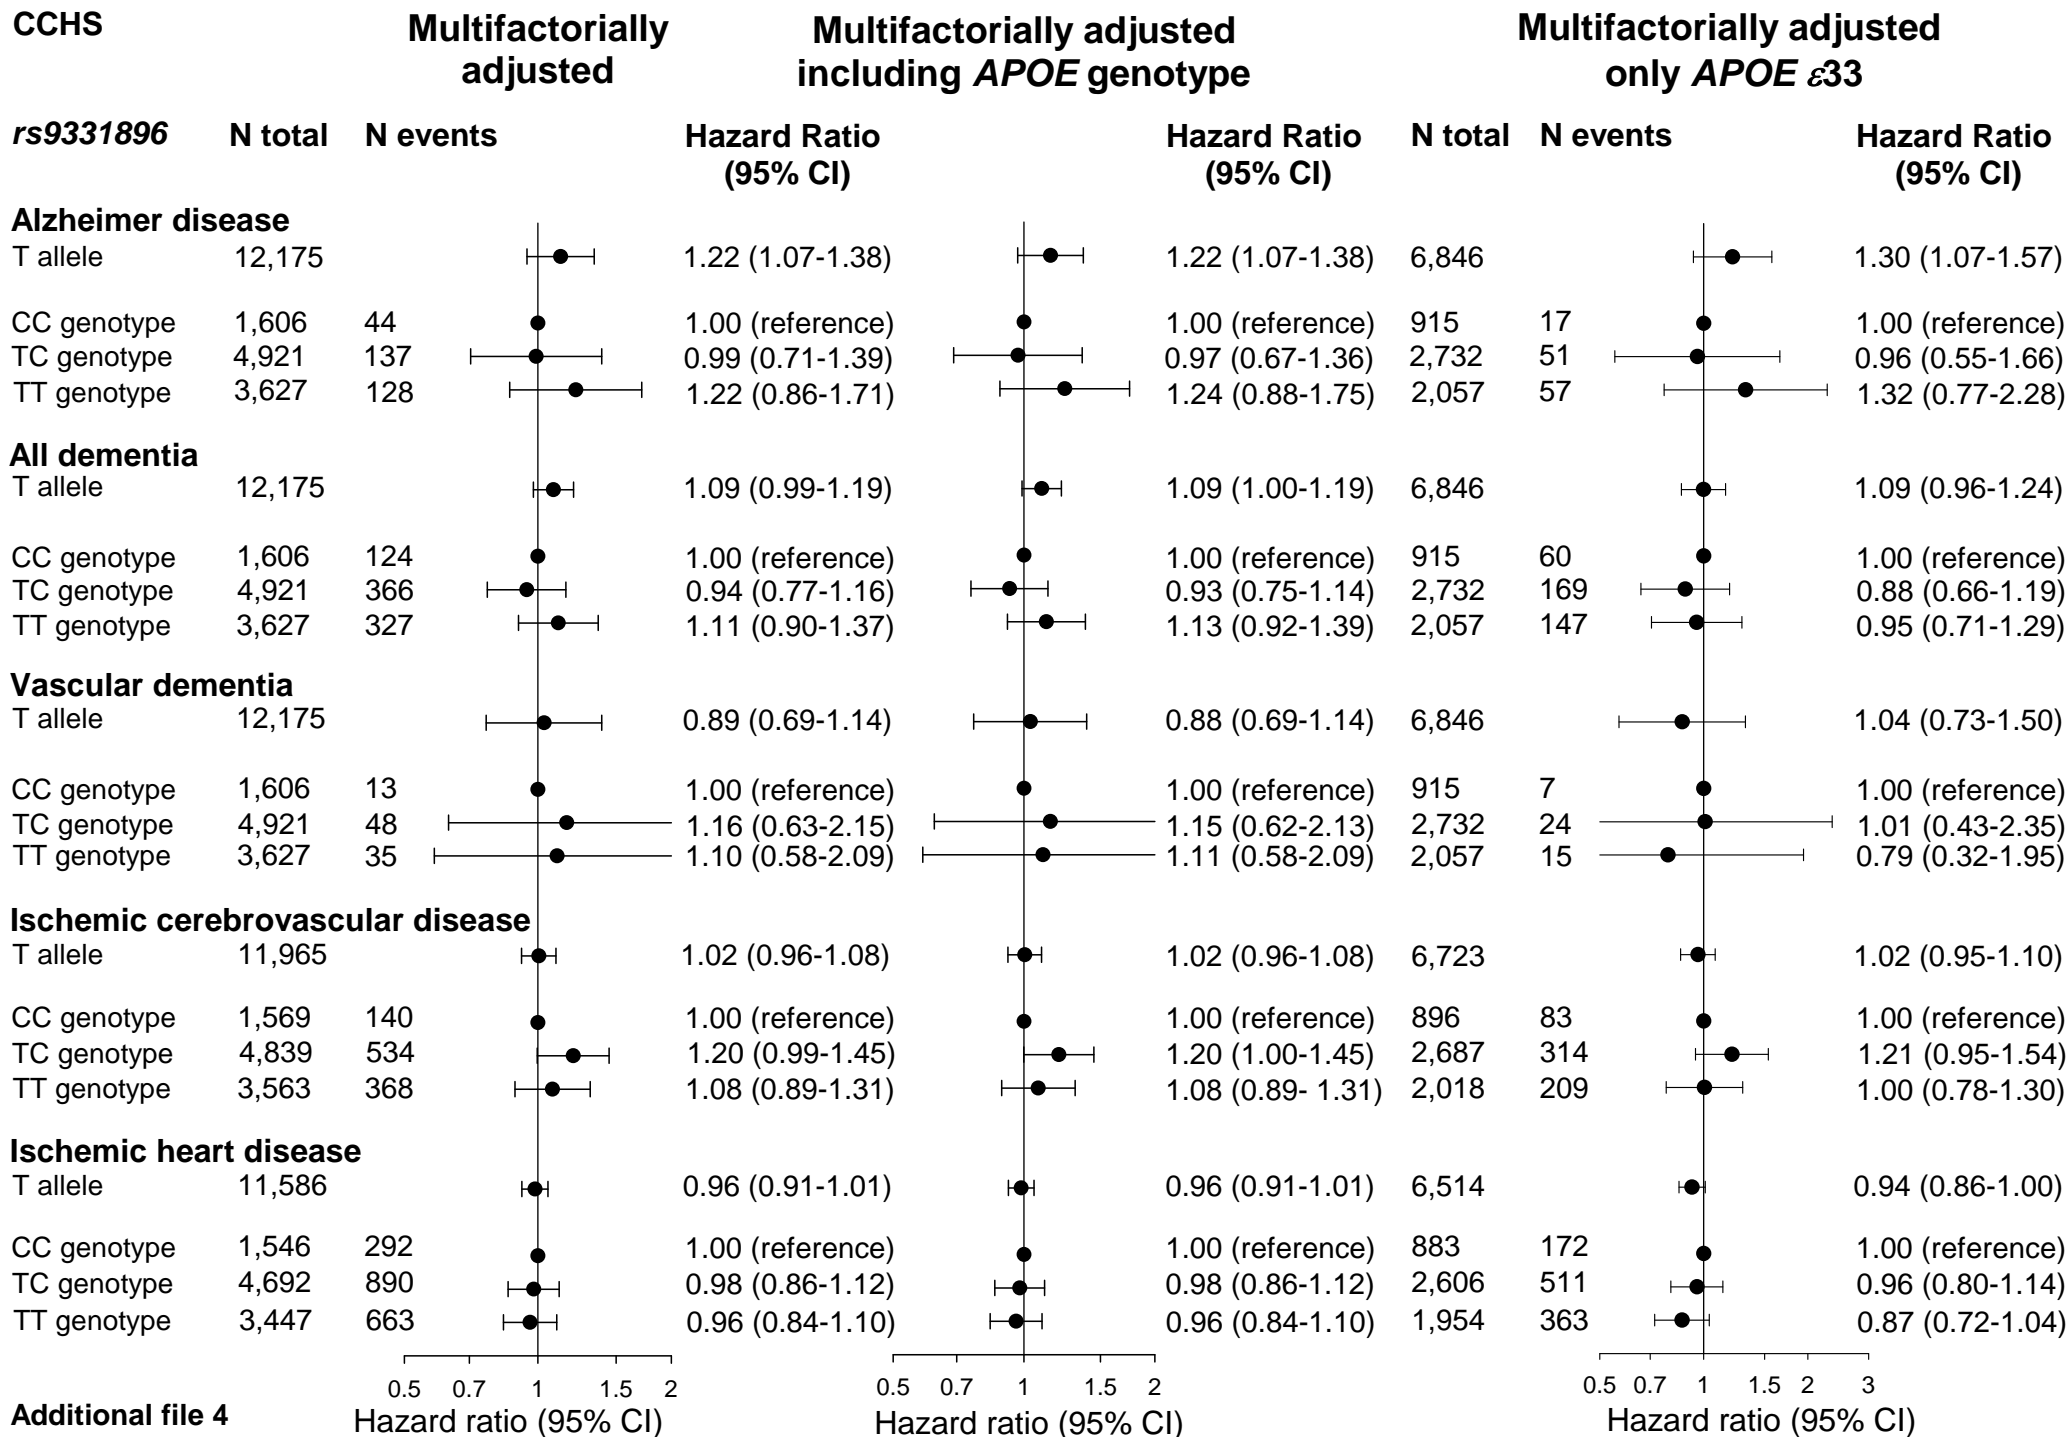

Supplement: MOESM4 [file 15534232]
